# Supplementary material for: SOX11 promotes epithelial/mesenchymal hybrid state and alters tropism of invasive breast cancer cells
Source: eLife. 2020 Sep 10;9:e58374. doi: 10.7554/eLife.58374 (PMC7518891; doi:10.7554/eLife.58374)
Supplement: Supplementary file 3. [file elife-58374-supp3.xlsx]

## Sheet: Top 38 FC>1.585
	2D	3D 5days	3D 2days
SOX11	7.57133	8.41025	8.75439
FGF9	6.12535	2.68313	2.30957
DRAXIN	5.61551	3.71903	4.60417
CHRM1	5.45905	1.71146	1.82785
HCN4	4.94253	3.5781	4.80405
YPEL1	4.9316	2.96696	3.20019
NELL2	4.81055	2.37881	3.22865
KCNMB4	4.72232	1.68547	2.25739
TOX	4.43392	1.99422	2.50263
MEX3B	4.10191	2.26597	2.54025
SLC6A16	4.06207	1.97078	1.97069
GPC2	4.03005	3.11691	3.37608
RASSF2	3.99786	3.93858	4.28981
SOAT2	3.9366	2.86903	3.3787
ACTN2	3.93503	6.2889	6.68182
TMSB15A	3.90014	2.78488	2.8521
TUBA1A	3.85811	2.35622	2.86587
OLFM2	3.81683	1.70699	1.81351
LBH	3.71239	3.24143	3.73612
TUBB4A	3.69439	2.70095	2.42448
SBK1	3.5074	2.43764	2.50534
MEX3A	3.40652	2.46873	2.68398
SLC29A4	3.3378	2.5609	2.38463
PLEKHO1	3.33649	2.57345	2.42797
FAM171A2	3.22414	2.30678	2.81802
BMF	2.87315	2.15965	2.17158
ADAMTS7	2.84335	2.53738	2.82128
FYN	2.80634	2.04408	2.24957
TUBB3	2.79706	1.85883	2.57161
LRRC17	2.60823	2.6795	3.03641
NDRG4	2.52204	1.76487	3.05388
MMP11	2.46169	1.89588	2.05366
SEPT3	2.22911	2.17413	2.36442
WNT6	2.12077	1.94115	2.75185
NREP	2.04586	1.68186	2.0138
MEIS3	1.90043	1.74005	1.72577
KALRN	1.83641	1.9553	2.1026
PLA2G4F	-3.21456	-1.60957	-1.73902

## Sheet: Top 180 FC > 0.585
	2D	3D 5days	3D 2days
SOX11	7.57133	8.41025	8.75439
FGF9	6.12535	2.68313	2.30957
EFR3B	5.99686	1.72575	1.47237
DRAXIN	5.61551	3.71903	4.60417
CHRM1	5.45905	1.71146	1.82785
THSD7A	5.3176	1.79605	1.23808
HCN4	4.94253	3.5781	4.80405
YPEL1	4.9316	2.96696	3.20019
NELL2	4.81055	2.37881	3.22865
KCNMB4	4.72232	1.68547	2.25739
MAFB	4.5163	1.51096	1.62356
TOX	4.43392	1.99422	2.50263
ABCG1	4.18928	1.28855	1.07366
MEX3B	4.10191	2.26597	2.54025
SLC6A16	4.06207	1.97078	1.97069
GPC2	4.03005	3.11691	3.37608
RASSF2	3.99786	3.93858	4.28981
ACTN2	3.93503	6.2889	6.68182
TMSB15A	3.90014	2.78488	2.8521
TUBA1A	3.85811	2.35622	2.86587
OLFM2	3.81683	1.70699	1.81351
C14orf37	3.72296	1.95176	1.26597
LBH	3.71239	3.24143	3.73612
TUBB4A	3.69439	2.70095	2.42448
MAPK4	3.63149	1.81711	1.43051
SBK1	3.5074	2.43764	2.50534
MDK	3.44572	1.39667	1.90013
MEX3A	3.40652	2.46873	2.68398
SLC29A4	3.3378	2.5609	2.38463
PLEKHO1	3.33649	2.57345	2.42797
FAM171A2	3.22414	2.30678	2.81802
LGALS9	3.21978	0.949583	1.24562
DDAH2	3.0485	1.04335	1.27113
CALML5	2.91134	1.38294	1.47864
BMF	2.87315	2.15965	2.17158
ADAMTS7	2.84335	2.53738	2.82128
ADAMTS4	2.8251	1.02543	1.86611
FYN	2.80634	2.04408	2.24957
TUBB3	2.79706	1.85883	2.57161
LRRC17	2.60823	2.6795	3.03641
MCF2L	2.60631	1.84997	1.51801
SEPT5	2.599	1.37345	2.36442
KIAA1755	2.54738	0.776993	1.12217
KIAA1211	2.52627	1.5762	1.75652
NDRG4	2.52204	1.76487	3.05388
RNF122	2.46944	1.38575	1.42198
MMP11	2.46169	1.89588	2.05366
CTXN1	2.4578	1.27989	1.60433
RCOR2	2.3865	1.39906	1.57478
EFNB3	2.36017	0.740398	0.858175
CDKN1C	2.35713	1.15949	1.43682
MARCKSL1	2.34416	0.807315	1.06239
SEPT3	2.22911	2.17413	2.36442
DBN1	2.14645	1.13814	1.3702
SEMA6C	2.1373	0.598502	0.964017
FBXO15	2.12685	0.881362	1.22491
WNT6	2.12077	1.94115	2.75185
D4S234E	2.07804	0.971533	1.01949
NREP	2.04586	1.68186	2.0138
ZSCAN2	2.0067	0.937156	1.19517
KIF3C	1.98937	1.24461	1.40515
ARNT2	1.9715	1.21417	1.48139
TP53I11	1.93616	0.749062	0.689337
RHOBTB1	1.91324	1.49526	1.6226
MEIS3	1.90043	1.74005	1.72577
TEAD2	1.88066	1.06727	1.21914
KALRN	1.83641	1.9553	2.1026
SWT1	1.80998	0.76259	0.940238
ZC4H2	1.76883	1.37616	1.33531
QRICH2	1.75023	0.901194	1.0206
RNF144A	1.74852	0.890875	0.873739
ZFHX2	1.72313	0.853284	0.95167
PCDHB2	1.7164	0.879983	0.979541
BDH2	1.705	0.920545	1.13622
MMP2	1.70386	1.39292	1.6212
GNG4	1.66739	0.686708	1.01064
CADM4	1.64799	0.823163	1.13886
MGAT5B	1.63782	1.72932	1.2967
C11orf95	1.62605	0.821971	1.17255
FKBP7	1.6098	0.904379	0.834669
SALL2	1.58394	0.836098	1.02242
CRISPLD2	1.5488	1.21566	1.33066
H2AFY2	1.53345	0.681518	0.783718
HES7	1.52113	1.44918	1.52627
MST1	1.49388	0.712056	1.00343
ZNF627	1.49373	0.736051	0.750008
GATS	1.49164	0.932982	0.899625
C2orf81	1.49063	0.619985	0.850666
CDH2	1.48522	1.06259	1.31532
MEX3D	1.47738	0.86119	0.866589
PLEKHA4	1.46381	0.696864	1.02956
TMEM59L	1.46194	1.30924	1.34436
CENPV	1.46016	1.21847	1.12215
F2R	1.45449	1.69256	1.97054
FAM227A	1.44902	1.27244	1.33792
PDZD4	1.42668	1.21937	1.06515
LRRC27	1.42424	0.621892	0.641964
CBX2	1.42016	0.979738	0.843718
DNAJC22	1.41729	0.752363	0.849295
MMP15	1.41169	0.971695	1.17885
IGSF9	1.3992	1.0086	1.07752
PARD6G	1.39866	0.768288	1.01308
ATAT1	1.38338	0.673443	0.974961
MAST1	1.34644	1.34931	1.57068
CACNB3	1.32721	0.945987	0.922995
TMEM86A	1.31159	0.92306	0.891194
ZBED3	1.30745	0.759506	0.697586
MICAL1	1.29654	0.882022	1.07234
PCDHGB2	1.25684	0.669081	0.765049
CCDC40	1.25311	1.29464	1.45717
C16orf45	1.25098	0.818644	1.06339
PPP1R15A	1.24163	1.13698	1.15053
PCDHGB1	1.22682	0.874222	0.822089
CYTH2	1.22332	0.643272	0.736942
CMTM3	1.20763	0.97637	1.43303
ZNF358	1.18535	0.598557	0.920316
MAP3K12	1.18257	0.911129	1.22864
B4GALNT4	1.15875	0.843014	1.02333
FAM171A1	1.15276	0.77371	0.845383
RGL1	1.15022	1.02119	1.03125
GRB10	1.14914	1.10944	1.11453
TGIF2	1.14306	0.624733	0.662594
PLCG1	1.1393	0.684503	0.796054
TMEM98	1.1385	1.27471	1.12089
HOXC9	1.13546	1.27437	1.18498
CDR2L	1.11612	0.685845	0.656252
FZD2	1.101	0.620526	0.762512
ZNF821	1.0912	0.651758	0.684314
ANO8	1.07492	0.689495	0.719643
STK38L	1.07113	0.702654	0.790196
ARHGEF19	1.06399	0.658945	0.785965
CCNJ	1.05985	0.850015	0.774786
SMARCD3	1.00879	0.996714	1.11434
C9orf116	1.00101	0.598905	0.880404
ZSCAN9	0.994586	0.668177	0.6753
ZNF74	0.97569	0.689982	0.845268
EVL	0.965087	0.844458	0.848247
SMOX	0.953948	0.668597	0.845797
ZNF250	0.949062	0.668897	0.838886
TMEM206	0.898389	0.638531	0.849116
KLHL7	0.890287	0.851002	0.907652
TCF3	0.883055	0.786441	0.849852
PDE7A	0.88255	0.773211	0.639355
KIAA0895L	0.854691	0.70042	0.703972
ARHGEF25	0.833102	0.621154	0.719292
S100A14	-0.659758	-0.773733	-1.00393
LIPG	-0.7139	-0.586905	-0.787392
COMTD1	-0.74651	-0.587379	-0.730199
TAP2	-0.748529	-0.845359	-0.822201
INSIG1	-0.75558	-0.93937	-1.17217
PRSS23	-0.792023	-1.07314	-0.956368
SH2D4A	-0.822914	-0.644981	-0.590631
HSD17B8	-0.82477	-0.756216	-0.66315
ADAM12	-0.852074	-0.728489	-0.712411
FUT3	-0.854515	-0.782151	-1.0556
AGFG2	-0.871056	-0.782904	-0.63617
PLCG2	-0.91312	-1.40938	-1.05108
GPRC5A	-0.930829	-0.714174	-0.923059
ALDH3B1	-0.983182	-1.08987	-1.54083
ALS2CL	-0.999967	-0.838626	-1.14416
KLHDC7A	-1.01057	-0.679644	-0.682318
RHOF	-1.07184	-0.921973	-1.068
RRAS	-1.08628	-0.996136	-1.01877
EML2	-1.09883	-0.755244	-0.696244
RAB26	-1.12594	-0.723889	-0.920369
NCEH1	-1.16213	-0.802661	-0.838613
BAIAP2L2	-1.20479	-0.710995	-0.64416
TGM5	-1.24193	-1.37756	-1.03793
FGFBP1	-1.24228	-0.747921	-0.979131
IFI35	-1.26301	-0.984195	-1.07736
C10orf54	-1.3356	-0.685919	-0.954298
RAET1E	-1.35135	-1.29785	-1.45039
CAPN12	-1.41684	-0.95824	-0.908076
TGM2	-1.58542	-1.47114	-1.31344
PAPPA	-1.65613	-1.5828	-1.67202
IVL	-1.78879	-0.680956	-0.922326
CD14	-1.80248	-1.40873	-1.86083
PTGES	-2.00107	-0.96775	-1.0577
SPRR1A	-2.31925	-0.700907	-1.18958
PLA2G4F	-3.21456	-1.60957	-1.73902
