# Supplementary material for: SOX11 promotes epithelial/mesenchymal hybrid state and alters tropism of invasive breast cancer cells
Source: eLife. 2020 Sep 10;9:e58374. doi: 10.7554/eLife.58374 (PMC7518891; doi:10.7554/eLife.58374)
Supplement: Supplementary file 4. [file elife-58374-supp4.xlsx]

## Sheet: 2D
	baseMean	log2FoldChange	lfcSE	stat	pvalue	padj	Symbol	Gene_type	disp	contrast
ENSG00000011426.9	2142.73	-0.178331	0.645435	-0.276296	0.782321	0.999966	ANLN	protein_coding	0.149624	(X2D_SOX11_DOX-X2D_SOX11_nDOX)-(X2D_EV_DOX-X2D_EV_nDOX)
ENSG00000089685.13	7414.17	0.00582643	0.338476	0.0172137	0.986266	0.999966	BIRC5	protein_coding	0.0411471	(X2D_SOX11_DOX-X2D_SOX11_nDOX)-(X2D_EV_DOX-X2D_EV_nDOX)
ENSG00000145386.8	1609.12	-0.31266	0.419319	-0.745637	0.455887	0.999966	CCNA2	protein_coding	0.0627252	(X2D_SOX11_DOX-X2D_SOX11_nDOX)-(X2D_EV_DOX-X2D_EV_nDOX)
ENSG00000134057.13	7188.9	-0.0738913	0.295613	-0.24996	0.802619	0.999966	CCNB1	protein_coding	0.0313462	(X2D_SOX11_DOX-X2D_SOX11_nDOX)-(X2D_EV_DOX-X2D_EV_nDOX)
ENSG00000175305.15	179.258	-0.136677	0.604878	-0.225959	0.821234	0.999966	CCNE2	protein_coding	0.125805	(X2D_SOX11_DOX-X2D_SOX11_nDOX)-(X2D_EV_DOX-X2D_EV_nDOX)
ENSG00000129810.13	155.575	-0.0500536	0.47028	-0.106433	0.915238	0.999966	SGOL1	protein_coding	0.0732731	(X2D_SOX11_DOX-X2D_SOX11_nDOX)-(X2D_EV_DOX-X2D_EV_nDOX)
ENSG00000112576.11	1985.54	-0.433586	0.426752	-1.01602	0.309622	0.999966	CCND3	protein_coding	0.0651114	(X2D_SOX11_DOX-X2D_SOX11_nDOX)-(X2D_EV_DOX-X2D_EV_nDOX)
ENSG00000152256.12	450.562	-0.080534	0.413524	-0.19475	0.845588	0.999966	PDK1	protein_coding	0.0589052	(X2D_SOX11_DOX-X2D_SOX11_nDOX)-(X2D_EV_DOX-X2D_EV_nDOX)
ENSG00000104738.15	5563.63	-0.333833	0.30489	-1.09493	0.273548	0.999966	MCM4	protein_coding	0.0333121	(X2D_SOX11_DOX-X2D_SOX11_nDOX)-(X2D_EV_DOX-X2D_EV_nDOX)
ENSG00000132646.9	5187.53	0.00719952	0.296006	0.0243222	0.980596	0.999966	PCNA	protein_coding	0.031377	(X2D_SOX11_DOX-X2D_SOX11_nDOX)-(X2D_EV_DOX-X2D_EV_nDOX)
ENSG00000171848.12	8600.44	-0.00657029	0.296477	-0.0221612	0.982319	0.999966	RRM2	protein_coding	0.0315418	(X2D_SOX11_DOX-X2D_SOX11_nDOX)-(X2D_EV_DOX-X2D_EV_nDOX)
ENSG00000131747.13	3125.33	0.239657	0.595781	0.402257	0.687495	0.999966	TOP2A	protein_coding	0.127572	(X2D_SOX11_DOX-X2D_SOX11_nDOX)-(X2D_EV_DOX-X2D_EV_nDOX)
ENSG00000172115.7	2532.05	-0.508765	0.351125	-1.44896	0.147349	0.999966	CYCS	protein_coding	0.044026	(X2D_SOX11_DOX-X2D_SOX11_nDOX)-(X2D_EV_DOX-X2D_EV_nDOX)
ENSG00000109919.8	3843.48	0.121011	0.348125	0.347609	0.728134	0.999966	MTCH2	protein_coding	0.0433999	(X2D_SOX11_DOX-X2D_SOX11_nDOX)-(X2D_EV_DOX-X2D_EV_nDOX)
ENSG00000005022.5	19554.9	-0.0644322	0.353692	-0.182171	0.855449	0.999966	SLC25A5	protein_coding	0.0450269	(X2D_SOX11_DOX-X2D_SOX11_nDOX)-(X2D_EV_DOX-X2D_EV_nDOX)
ENSG00000164032.10	9850.27	0.0319593	0.261625	0.122157	0.902775	0.999966	H2AFZ	protein_coding	0.0245629	(X2D_SOX11_DOX-X2D_SOX11_nDOX)-(X2D_EV_DOX-X2D_EV_nDOX)
ENSG00000128708.11	1073.54	-0.374749	0.653442	-0.5735	0.566306	0.999966	HAT1	protein_coding	0.152849	(X2D_SOX11_DOX-X2D_SOX11_nDOX)-(X2D_EV_DOX-X2D_EV_nDOX)
ENSG00000080503.18	944.5	0.141807	0.557734	0.254255	0.799298	0.999966	SMARCA2	protein_coding	0.110973	(X2D_SOX11_DOX-X2D_SOX11_nDOX)-(X2D_EV_DOX-X2D_EV_nDOX)
ENSG00000118689.13	366.499	-0.0708537	0.462686	-0.153135	0.878291	0.999966	FOXO3	protein_coding	0.0741345	(X2D_SOX11_DOX-X2D_SOX11_nDOX)-(X2D_EV_DOX-X2D_EV_nDOX)
ENSG00000108799.11	298.854	0.358902	0.368208	0.974726	0.329696	0.999966	EZH1	protein_coding	0.0454995	(X2D_SOX11_DOX-X2D_SOX11_nDOX)-(X2D_EV_DOX-X2D_EV_nDOX)
ENSG00000138738.9	15.3542	0.0198373	0.803701	0.0246825	0.980308	0.999966	PRDM5	protein_coding	0.167655	(X2D_SOX11_DOX-X2D_SOX11_nDOX)-(X2D_EV_DOX-X2D_EV_nDOX)
ENSG00000104960.14	4393.69	0.770803	0.439917	1.75216	0.079747	0.999966	PTOV1	protein_coding	0.069491	(X2D_SOX11_DOX-X2D_SOX11_nDOX)-(X2D_EV_DOX-X2D_EV_nDOX)
ENSG00000120784.14	109.91	0.111203	0.442805	0.251134	0.80171	0.999966	ZFP30	protein_coding	0.0602742	(X2D_SOX11_DOX-X2D_SOX11_nDOX)-(X2D_EV_DOX-X2D_EV_nDOX)
ENSG00000181722.14	5.74639	0.126697	1.2031	0.105309	0.91613	0.999966	ZBTB20	protein_coding	0.338982	(X2D_SOX11_DOX-X2D_SOX11_nDOX)-(X2D_EV_DOX-X2D_EV_nDOX)
ENSG00000112511.16	576.749	-0.24897	0.349406	-0.712553	0.476123	0.999966	PHF1	protein_coding	0.0421546	(X2D_SOX11_DOX-X2D_SOX11_nDOX)-(X2D_EV_DOX-X2D_EV_nDOX)
ENSG00000144579.6	1753.4	-0.181581	0.447154	-0.40608	0.684684	0.999966	CTDSP1	protein_coding	0.0714389	(X2D_SOX11_DOX-X2D_SOX11_nDOX)-(X2D_EV_DOX-X2D_EV_nDOX)
ENSG00000126351.11	424.794	0.0413491	0.40864	0.101187	0.919402	0.999966	THRA	protein_coding	0.0574783	(X2D_SOX11_DOX-X2D_SOX11_nDOX)-(X2D_EV_DOX-X2D_EV_nDOX)
ENSG00000167074.13	820.395	0.259711	0.383698	0.676864	0.498492	0.999966	TEF	protein_coding	0.0516593	(X2D_SOX11_DOX-X2D_SOX11_nDOX)-(X2D_EV_DOX-X2D_EV_nDOX)
ENSG00000123136.13	5546.04	-0.374388	0.37037	-1.01085	0.312089	0.999966	DDX39A	protein_coding	0.0492444	(X2D_SOX11_DOX-X2D_SOX11_nDOX)-(X2D_EV_DOX-X2D_EV_nDOX)
ENSG00000100697.13	349.776	-0.0245199	0.557591	-0.0439747	0.964925	0.999966	DICER1	protein_coding	0.108935	(X2D_SOX11_DOX-X2D_SOX11_nDOX)-(X2D_EV_DOX-X2D_EV_nDOX)
ENSG00000116489.11	1950.58	-0.0780993	0.521255	-0.149829	0.880899	0.999966	CAPZA1	protein_coding	0.097387	(X2D_SOX11_DOX-X2D_SOX11_nDOX)-(X2D_EV_DOX-X2D_EV_nDOX)
ENSG00000138029.12	4326.34	0.0561285	0.286283	0.196059	0.844564	0.999966	HADHB	protein_coding	0.0293025	(X2D_SOX11_DOX-X2D_SOX11_nDOX)-(X2D_EV_DOX-X2D_EV_nDOX)
ENSG00000166411.12	2031.79	-0.716054	0.407996	-1.75505	0.0792503	0.999966	IDH3A	protein_coding	0.0594219	(X2D_SOX11_DOX-X2D_SOX11_nDOX)-(X2D_EV_DOX-X2D_EV_nDOX)
ENSG00000182481.7	8501.02	0.147863	0.326606	0.452724	0.650747	0.999966	KPNA2	protein_coding	0.0383193	(X2D_SOX11_DOX-X2D_SOX11_nDOX)-(X2D_EV_DOX-X2D_EV_nDOX)
ENSG00000102144.12	23788	0.0877108	0.394247	0.222477	0.823943	0.999966	PGK1	protein_coding	0.0559636	(X2D_SOX11_DOX-X2D_SOX11_nDOX)-(X2D_EV_DOX-X2D_EV_nDOX)
ENSG00000141376.19	307.851	0.656424	0.421888	1.55592	0.119727	0.999966	BCAS3	protein_coding	0.0605386	(X2D_SOX11_DOX-X2D_SOX11_nDOX)-(X2D_EV_DOX-X2D_EV_nDOX)
ENSG00000067048.15	0	NA	NA	NA	NA	NA	DDX3Y	protein_coding	NA	(X2D_SOX11_DOX-X2D_SOX11_nDOX)-(X2D_EV_DOX-X2D_EV_nDOX)
ENSG00000139112.9	327.984	0.403561	0.312177	1.29273	0.196104	0.999966	GABARAPL1	protein_coding	0.0319925	(X2D_SOX11_DOX-X2D_SOX11_nDOX)-(X2D_EV_DOX-X2D_EV_nDOX)
ENSG00000105373.17	8204.22	0.2297	0.414001	0.554829	0.579012	0.999966	GLTSCR2	protein_coding	0.0616326	(X2D_SOX11_DOX-X2D_SOX11_nDOX)-(X2D_EV_DOX-X2D_EV_nDOX)
ENSG00000078596.9	0.144892	1.82468	6.23205	0.29279	0.769683	NA	ITM2A	protein_coding	12	(X2D_SOX11_DOX-X2D_SOX11_nDOX)-(X2D_EV_DOX-X2D_EV_nDOX)
ENSG00000150782.10	1050.92	-0.655061	0.331102	-1.97842	0.0478809	0.999966	IL18	protein_coding	0.0384221	(X2D_SOX11_DOX-X2D_SOX11_nDOX)-(X2D_EV_DOX-X2D_EV_nDOX)
ENSG00000159840.14	4821.59	-0.123906	0.518319	-0.239054	0.811064	0.999966	ZYX	protein_coding	0.0965853	(X2D_SOX11_DOX-X2D_SOX11_nDOX)-(X2D_EV_DOX-X2D_EV_nDOX)
ENSG00000143819.11	2624.92	-0.401903	0.374596	-1.0729	0.283316	0.999966	EPHX1	protein_coding	0.0501805	(X2D_SOX11_DOX-X2D_SOX11_nDOX)-(X2D_EV_DOX-X2D_EV_nDOX)
ENSG00000171603.15	9807.53	0.245545	0.489968	0.501144	0.61627	0.999966	CLSTN1	protein_coding	0.0863867	(X2D_SOX11_DOX-X2D_SOX11_nDOX)-(X2D_EV_DOX-X2D_EV_nDOX)
ENSG00000197448.12	2078.3	-0.069758	0.338123	-0.20631	0.836549	0.999966	GSTK1	protein_coding	0.0407168	(X2D_SOX11_DOX-X2D_SOX11_nDOX)-(X2D_EV_DOX-X2D_EV_nDOX)
ENSG00000099977.12	1591.59	-0.582074	0.316957	-1.83644	0.0662922	0.999966	DDT	protein_coding	0.0355461	(X2D_SOX11_DOX-X2D_SOX11_nDOX)-(X2D_EV_DOX-X2D_EV_nDOX)
ENSG00000128928.7	3551.46	-0.204331	0.351132	-0.581922	0.560619	0.999966	IVD	protein_coding	0.0441398	(X2D_SOX11_DOX-X2D_SOX11_nDOX)-(X2D_EV_DOX-X2D_EV_nDOX)
ENSG00000022267.15	55.6698	0.517206	0.781283	0.661996	0.507974	0.999966	FHL1	protein_coding	0.181573	(X2D_SOX11_DOX-X2D_SOX11_nDOX)-(X2D_EV_DOX-X2D_EV_nDOX)
ENSG00000165795.19	593.622	0.601224	0.42978	1.39891	0.161839	0.999966	NDRG2	protein_coding	0.0647489	(X2D_SOX11_DOX-X2D_SOX11_nDOX)-(X2D_EV_DOX-X2D_EV_nDOX)
ENSG00000178719.15	3356.61	0.0498679	0.48825	0.102136	0.918649	0.999966	GRINA	protein_coding	0.0855863	(X2D_SOX11_DOX-X2D_SOX11_nDOX)-(X2D_EV_DOX-X2D_EV_nDOX)
ENSG00000145675.13	578.235	0.208125	0.543833	0.3827	0.701942	0.999966	PIK3R1	protein_coding	0.104674	(X2D_SOX11_DOX-X2D_SOX11_nDOX)-(X2D_EV_DOX-X2D_EV_nDOX)
ENSG00000010810.16	55.9336	2.80634	0.650913	4.31139	1.6223e-05	0.00860883	FYN	protein_coding	0.11586	(X2D_SOX11_DOX-X2D_SOX11_nDOX)-(X2D_EV_DOX-X2D_EV_nDOX)
ENSG00000100288.18	9.27308	0.208299	0.98641	0.211169	0.832755	0.999966	CHKB	protein_coding	0.22039	(X2D_SOX11_DOX-X2D_SOX11_nDOX)-(X2D_EV_DOX-X2D_EV_nDOX)
ENSG00000158828.5	906.996	-0.0217322	0.391184	-0.0555549	0.955696	0.999966	PINK1	protein_coding	0.0539863	(X2D_SOX11_DOX-X2D_SOX11_nDOX)-(X2D_EV_DOX-X2D_EV_nDOX)
ENSG00000083290.18	293.784	0.249308	0.358965	0.694518	0.487358	0.999966	ULK2	protein_coding	0.0430314	(X2D_SOX11_DOX-X2D_SOX11_nDOX)-(X2D_EV_DOX-X2D_EV_nDOX)
ENSG00000128590.4	106.456	-0.526855	0.579382	-0.90934	0.363171	0.999966	DNAJB9	protein_coding	0.111212	(X2D_SOX11_DOX-X2D_SOX11_nDOX)-(X2D_EV_DOX-X2D_EV_nDOX)
ENSG00000123349.12	4178.32	0.159376	0.338908	0.470263	0.638167	0.999966	PFDN5	protein_coding	0.0411476	(X2D_SOX11_DOX-X2D_SOX11_nDOX)-(X2D_EV_DOX-X2D_EV_nDOX)
ENSG00000174080.9	587.307	0.524342	0.44254	1.18485	0.236079	0.999966	CTSF	protein_coding	0.0686656	(X2D_SOX11_DOX-X2D_SOX11_nDOX)-(X2D_EV_DOX-X2D_EV_nDOX)
ENSG00000150938.8	1423.95	-0.383329	0.468243	-0.818654	0.412984	0.999966	CRIM1	protein_coding	0.078237	(X2D_SOX11_DOX-X2D_SOX11_nDOX)-(X2D_EV_DOX-X2D_EV_nDOX)
ENSG00000250722.4	4.47095	1.68857	1.47391	1.14564	0.251943	NA	SEPP1	protein_coding	0.400185	(X2D_SOX11_DOX-X2D_SOX11_nDOX)-(X2D_EV_DOX-X2D_EV_nDOX)
ENSG00000204681.9	108.043	0.414726	0.479342	0.865198	0.38693	0.999966	GABBR1	protein_coding	0.0701944	(X2D_SOX11_DOX-X2D_SOX11_nDOX)-(X2D_EV_DOX-X2D_EV_nDOX)
ENSG00000106070.16	340.4	1.14914	0.482463	2.38183	0.0172269	0.785534	GRB10	protein_coding	0.080484	(X2D_SOX11_DOX-X2D_SOX11_nDOX)-(X2D_EV_DOX-X2D_EV_nDOX)
ENSG00000125124.10	273.404	0.26211	0.357717	0.732728	0.463724	0.999966	BBS2	protein_coding	0.0423514	(X2D_SOX11_DOX-X2D_SOX11_nDOX)-(X2D_EV_DOX-X2D_EV_nDOX)
ENSG00000164587.10	44815	-0.0620906	0.34146	-0.181839	0.855709	0.999966	RPS14	protein_coding	0.0419915	(X2D_SOX11_DOX-X2D_SOX11_nDOX)-(X2D_EV_DOX-X2D_EV_nDOX)
ENSG00000197081.11	2921.04	0.449892	0.489513	0.91906	0.358064	0.999966	IGF2R	protein_coding	0.0859817	(X2D_SOX11_DOX-X2D_SOX11_nDOX)-(X2D_EV_DOX-X2D_EV_nDOX)
ENSG00000143416.19	455.295	0.99905	0.4253	2.34905	0.0188214	0.818199	SELENBP1	protein_coding	0.0626926	(X2D_SOX11_DOX-X2D_SOX11_nDOX)-(X2D_EV_DOX-X2D_EV_nDOX)
ENSG00000108523.14	3114.26	-0.240335	0.356086	-0.674934	0.499717	0.999966	RNF167	protein_coding	0.0453655	(X2D_SOX11_DOX-X2D_SOX11_nDOX)-(X2D_EV_DOX-X2D_EV_nDOX)
ENSG00000101460.11	0.458302	-1.36094	5.50381	-0.247272	0.804698	NA	MAP1LC3A	protein_coding	9.22651	(X2D_SOX11_DOX-X2D_SOX11_nDOX)-(X2D_EV_DOX-X2D_EV_nDOX)

## Sheet: 3D 2days
	baseMean	log2FoldChange	lfcSE	stat	pvalue	padj	Symbol	Gene_type	disp	contrast
ENSG00000011426.9	2179.78	-0.743814	0.193419	-3.84561	0.000120254	0.00529189	ANLN	protein_coding	0.012985	(X3D_SOX11_DOX2d-X3D_SOX11_nDOX)-(X3D_EV_DOX2d-X3D_EV_nDOX)
ENSG00000089685.13	1915.29	-0.399765	0.175075	-2.2834	0.022407	0.149651	BIRC5	protein_coding	0.0105012	(X3D_SOX11_DOX2d-X3D_SOX11_nDOX)-(X3D_EV_DOX2d-X3D_EV_nDOX)
ENSG00000145386.8	1150.08	-0.492664	0.198392	-2.48329	0.0130176	0.108073	CCNA2	protein_coding	0.0132672	(X3D_SOX11_DOX2d-X3D_SOX11_nDOX)-(X3D_EV_DOX2d-X3D_EV_nDOX)
ENSG00000134057.13	2665.45	-0.341545	0.179244	-1.90547	0.0567186	0.254197	CCNB1	protein_coding	0.0111869	(X3D_SOX11_DOX2d-X3D_SOX11_nDOX)-(X3D_EV_DOX2d-X3D_EV_nDOX)
ENSG00000175305.15	372.595	-0.395024	0.223673	-1.76608	0.0773826	0.30121	CCNE2	protein_coding	0.0151305	(X3D_SOX11_DOX2d-X3D_SOX11_nDOX)-(X3D_EV_DOX2d-X3D_EV_nDOX)
ENSG00000129810.13	189.192	-0.483819	0.211151	-2.29134	0.0219439	0.148005	SGOL1	protein_coding	0.0106599	(X3D_SOX11_DOX2d-X3D_SOX11_nDOX)-(X3D_EV_DOX2d-X3D_EV_nDOX)
ENSG00000112576.11	939.34	-0.320634	0.150408	-2.13176	0.0330263	0.184787	CCND3	protein_coding	0.00706853	(X3D_SOX11_DOX2d-X3D_SOX11_nDOX)-(X3D_EV_DOX2d-X3D_EV_nDOX)
ENSG00000152256.12	582.917	-0.699764	0.408109	-1.71465	0.0864099	0.319054	PDK1	protein_coding	0.0581962	(X3D_SOX11_DOX2d-X3D_SOX11_nDOX)-(X3D_EV_DOX2d-X3D_EV_nDOX)
ENSG00000104738.15	3640.46	-0.384703	0.166715	-2.30755	0.0210244	0.144038	MCM4	protein_coding	0.00972749	(X3D_SOX11_DOX2d-X3D_SOX11_nDOX)-(X3D_EV_DOX2d-X3D_EV_nDOX)
ENSG00000132646.9	2937.11	-0.271118	0.14406	-1.88197	0.0598396	0.262125	PCNA	protein_coding	0.00712192	(X3D_SOX11_DOX2d-X3D_SOX11_nDOX)-(X3D_EV_DOX2d-X3D_EV_nDOX)
ENSG00000171848.12	4981.73	-0.553662	0.178016	-3.11017	0.00186978	0.0316544	RRM2	protein_coding	0.0111954	(X3D_SOX11_DOX2d-X3D_SOX11_nDOX)-(X3D_EV_DOX2d-X3D_EV_nDOX)
ENSG00000131747.13	4792.57	-0.277609	0.14961	-1.85556	0.063517	0.271662	TOP2A	protein_coding	0.00784961	(X3D_SOX11_DOX2d-X3D_SOX11_nDOX)-(X3D_EV_DOX2d-X3D_EV_nDOX)
ENSG00000172115.7	3000.81	-0.207709	0.128782	-1.61288	0.10677	0.359358	CYCS	protein_coding	0.00562488	(X3D_SOX11_DOX2d-X3D_SOX11_nDOX)-(X3D_EV_DOX2d-X3D_EV_nDOX)
ENSG00000109919.8	2440.71	-0.111248	0.10182	-1.0926	0.274569	0.585459	MTCH2	protein_coding	0.00331619	(X3D_SOX11_DOX2d-X3D_SOX11_nDOX)-(X3D_EV_DOX2d-X3D_EV_nDOX)
ENSG00000005022.5	9222.32	-0.313877	0.133835	-2.34526	0.0190141	0.135037	SLC25A5	protein_coding	0.00634324	(X3D_SOX11_DOX2d-X3D_SOX11_nDOX)-(X3D_EV_DOX2d-X3D_EV_nDOX)
ENSG00000164032.10	5310.74	-0.210771	0.157106	-1.34158	0.179731	0.473462	H2AFZ	protein_coding	0.00870035	(X3D_SOX11_DOX2d-X3D_SOX11_nDOX)-(X3D_EV_DOX2d-X3D_EV_nDOX)
ENSG00000128708.11	1583.44	-0.283041	0.146535	-1.93156	0.0534143	0.245367	HAT1	protein_coding	0.00709637	(X3D_SOX11_DOX2d-X3D_SOX11_nDOX)-(X3D_EV_DOX2d-X3D_EV_nDOX)
ENSG00000080503.18	2977.52	-0.0713897	0.0925326	-0.771508	0.440406	0.72694	SMARCA2	protein_coding	0.00274368	(X3D_SOX11_DOX2d-X3D_SOX11_nDOX)-(X3D_EV_DOX2d-X3D_EV_nDOX)
ENSG00000118689.13	1977.26	0.0420336	0.130033	0.323255	0.746502	0.899584	FOXO3	protein_coding	0.00557324	(X3D_SOX11_DOX2d-X3D_SOX11_nDOX)-(X3D_EV_DOX2d-X3D_EV_nDOX)
ENSG00000108799.11	775.381	0.102408	0.141557	0.723438	0.469411	0.749657	EZH1	protein_coding	0.00589361	(X3D_SOX11_DOX2d-X3D_SOX11_nDOX)-(X3D_EV_DOX2d-X3D_EV_nDOX)
ENSG00000138738.9	52.5549	-0.551534	0.378213	-1.45826	0.144768	0.42286	PRDM5	protein_coding	0.0324074	(X3D_SOX11_DOX2d-X3D_SOX11_nDOX)-(X3D_EV_DOX2d-X3D_EV_nDOX)
ENSG00000104960.14	4257.27	0.288164	0.124428	2.31591	0.0205632	0.141827	PTOV1	protein_coding	0.00533272	(X3D_SOX11_DOX2d-X3D_SOX11_nDOX)-(X3D_EV_DOX2d-X3D_EV_nDOX)
ENSG00000120784.14	348.231	0.251884	0.214441	1.1746	0.240153	0.548692	ZFP30	protein_coding	0.0134977	(X3D_SOX11_DOX2d-X3D_SOX11_nDOX)-(X3D_EV_DOX2d-X3D_EV_nDOX)
ENSG00000181722.14	38.0118	-0.572298	0.483639	-1.18332	0.236684	0.545132	ZBTB20	protein_coding	0.0565135	(X3D_SOX11_DOX2d-X3D_SOX11_nDOX)-(X3D_EV_DOX2d-X3D_EV_nDOX)
ENSG00000112511.16	895.409	-0.144983	0.139739	-1.03752	0.299492	0.608744	PHF1	protein_coding	0.00592267	(X3D_SOX11_DOX2d-X3D_SOX11_nDOX)-(X3D_EV_DOX2d-X3D_EV_nDOX)
ENSG00000144579.6	1749.01	-0.0844702	0.104334	-0.809615	0.418162	0.711956	CTDSP1	protein_coding	0.00334971	(X3D_SOX11_DOX2d-X3D_SOX11_nDOX)-(X3D_EV_DOX2d-X3D_EV_nDOX)
ENSG00000126351.11	347.533	0.0324178	0.218032	0.148684	0.881803	0.957358	THRA	protein_coding	0.0141469	(X3D_SOX11_DOX2d-X3D_SOX11_nDOX)-(X3D_EV_DOX2d-X3D_EV_nDOX)
ENSG00000167074.13	637.206	-0.122751	0.160328	-0.765625	0.443899	0.729578	TEF	protein_coding	0.00765984	(X3D_SOX11_DOX2d-X3D_SOX11_nDOX)-(X3D_EV_DOX2d-X3D_EV_nDOX)
ENSG00000123136.13	1625.3	-0.245725	0.206218	-1.19158	0.233427	0.541165	DDX39A	protein_coding	0.0146987	(X3D_SOX11_DOX2d-X3D_SOX11_nDOX)-(X3D_EV_DOX2d-X3D_EV_nDOX)
ENSG00000100697.13	1787.93	-0.186259	0.170075	-1.09516	0.273445	0.584105	DICER1	protein_coding	0.00983955	(X3D_SOX11_DOX2d-X3D_SOX11_nDOX)-(X3D_EV_DOX2d-X3D_EV_nDOX)
ENSG00000116489.11	4135.67	-0.211638	0.108962	-1.9423	0.0521008	0.240729	CAPZA1	protein_coding	0.00403239	(X3D_SOX11_DOX2d-X3D_SOX11_nDOX)-(X3D_EV_DOX2d-X3D_EV_nDOX)
ENSG00000138029.12	4567.57	-0.162092	0.0964009	-1.68143	0.0926792	0.331845	HADHB	protein_coding	0.00312852	(X3D_SOX11_DOX2d-X3D_SOX11_nDOX)-(X3D_EV_DOX2d-X3D_EV_nDOX)
ENSG00000166411.12	1609.09	-0.545383	0.149416	-3.6501	0.00026214	0.00921732	IDH3A	protein_coding	0.00739736	(X3D_SOX11_DOX2d-X3D_SOX11_nDOX)-(X3D_EV_DOX2d-X3D_EV_nDOX)
ENSG00000182481.7	7813.99	-0.201842	0.125827	-1.60413	0.108686	0.362354	KPNA2	protein_coding	0.00557421	(X3D_SOX11_DOX2d-X3D_SOX11_nDOX)-(X3D_EV_DOX2d-X3D_EV_nDOX)
ENSG00000102144.12	10090.6	-0.495588	0.305453	-1.62247	0.104703	0.354936	PGK1	protein_coding	0.0335226	(X3D_SOX11_DOX2d-X3D_SOX11_nDOX)-(X3D_EV_DOX2d-X3D_EV_nDOX)
ENSG00000141376.19	669.25	0.301957	0.146633	2.05927	0.0394685	0.204776	BCAS3	protein_coding	0.00619287	(X3D_SOX11_DOX2d-X3D_SOX11_nDOX)-(X3D_EV_DOX2d-X3D_EV_nDOX)
ENSG00000067048.15	0.0539202	-0.245134	7.44927	-0.0329071	0.973749	NA	DDX3Y	protein_coding	18	(X3D_SOX11_DOX2d-X3D_SOX11_nDOX)-(X3D_EV_DOX2d-X3D_EV_nDOX)
ENSG00000139112.9	899.593	0.321688	0.140089	2.2963	0.0216585	0.14684	GABARAPL1	protein_coding	0.00589962	(X3D_SOX11_DOX2d-X3D_SOX11_nDOX)-(X3D_EV_DOX2d-X3D_EV_nDOX)
ENSG00000105373.17	6811.46	0.165387	0.135808	1.2178	0.223299	0.527832	GLTSCR2	protein_coding	0.00649557	(X3D_SOX11_DOX2d-X3D_SOX11_nDOX)-(X3D_EV_DOX2d-X3D_EV_nDOX)
ENSG00000078596.9	0.482942	15.8153	4.73417	3.34067	0.000835771	NA	ITM2A	protein_coding	6.29203	(X3D_SOX11_DOX2d-X3D_SOX11_nDOX)-(X3D_EV_DOX2d-X3D_EV_nDOX)
ENSG00000150782.10	1484.88	-0.432352	0.1685	-2.56588	0.0102914	0.0935618	IL18	protein_coding	0.00952656	(X3D_SOX11_DOX2d-X3D_SOX11_nDOX)-(X3D_EV_DOX2d-X3D_EV_nDOX)
ENSG00000159840.14	1848.79	-0.0463716	0.157636	-0.294169	0.768629	0.907925	ZYX	protein_coding	0.00841932	(X3D_SOX11_DOX2d-X3D_SOX11_nDOX)-(X3D_EV_DOX2d-X3D_EV_nDOX)
ENSG00000143819.11	1529.87	-0.8255	0.368834	-2.23813	0.0252124	0.160114	EPHX1	protein_coding	0.0482356	(X3D_SOX11_DOX2d-X3D_SOX11_nDOX)-(X3D_EV_DOX2d-X3D_EV_nDOX)
ENSG00000171603.15	16229.3	-0.0880899	0.10582	-0.832452	0.405154	0.702822	CLSTN1	protein_coding	0.00397283	(X3D_SOX11_DOX2d-X3D_SOX11_nDOX)-(X3D_EV_DOX2d-X3D_EV_nDOX)
ENSG00000197448.12	2649.19	-0.0773193	0.0991158	-0.780091	0.435338	0.723704	GSTK1	protein_coding	0.00315311	(X3D_SOX11_DOX2d-X3D_SOX11_nDOX)-(X3D_EV_DOX2d-X3D_EV_nDOX)
ENSG00000099977.12	585.765	-0.525402	0.201644	-2.60559	0.00917161	0.0865631	DDT	protein_coding	0.0128402	(X3D_SOX11_DOX2d-X3D_SOX11_nDOX)-(X3D_EV_DOX2d-X3D_EV_nDOX)
ENSG00000128928.7	4157.56	-0.215316	0.0918329	-2.34465	0.0190447	0.135188	IVD	protein_coding	0.00278974	(X3D_SOX11_DOX2d-X3D_SOX11_nDOX)-(X3D_EV_DOX2d-X3D_EV_nDOX)
ENSG00000022267.15	42.8742	0.242645	0.416461	0.582634	0.56014	0.802836	FHL1	protein_coding	0.0382968	(X3D_SOX11_DOX2d-X3D_SOX11_nDOX)-(X3D_EV_DOX2d-X3D_EV_nDOX)
ENSG00000165795.19	2728.07	0.184801	0.146762	1.25919	0.207963	0.510687	NDRG2	protein_coding	0.00736253	(X3D_SOX11_DOX2d-X3D_SOX11_nDOX)-(X3D_EV_DOX2d-X3D_EV_nDOX)
ENSG00000178719.15	2828.38	0.036569	0.120383	0.303773	0.761301	0.905027	GRINA	protein_coding	0.00486431	(X3D_SOX11_DOX2d-X3D_SOX11_nDOX)-(X3D_EV_DOX2d-X3D_EV_nDOX)
ENSG00000145675.13	4397.72	-0.311547	0.178483	-1.74553	0.080893	0.307685	PIK3R1	protein_coding	0.0112416	(X3D_SOX11_DOX2d-X3D_SOX11_nDOX)-(X3D_EV_DOX2d-X3D_EV_nDOX)
ENSG00000010810.16	91.5173	2.24957	0.411652	5.46473	4.63611e-08	1.4151e-05	FYN	protein_coding	0.0422137	(X3D_SOX11_DOX2d-X3D_SOX11_nDOX)-(X3D_EV_DOX2d-X3D_EV_nDOX)
ENSG00000100288.18	39.2561	0.379082	0.529182	0.716354	0.473773	0.752185	CHKB	protein_coding	0.0729671	(X3D_SOX11_DOX2d-X3D_SOX11_nDOX)-(X3D_EV_DOX2d-X3D_EV_nDOX)
ENSG00000158828.5	1104.82	-0.310234	0.113992	-2.72154	0.00649787	0.0709599	PINK1	protein_coding	0.00375103	(X3D_SOX11_DOX2d-X3D_SOX11_nDOX)-(X3D_EV_DOX2d-X3D_EV_nDOX)
ENSG00000083290.18	706.51	0.139332	0.132084	1.05488	0.29148	0.600802	ULK2	protein_coding	0.00484817	(X3D_SOX11_DOX2d-X3D_SOX11_nDOX)-(X3D_EV_DOX2d-X3D_EV_nDOX)
ENSG00000128590.4	654.914	-0.0831718	0.264613	-0.314314	0.753282	0.901423	DNAJB9	protein_coding	0.0235548	(X3D_SOX11_DOX2d-X3D_SOX11_nDOX)-(X3D_EV_DOX2d-X3D_EV_nDOX)
ENSG00000123349.12	3816.64	0.118003	0.10773	1.09535	0.273362	0.5841	PFDN5	protein_coding	0.00391968	(X3D_SOX11_DOX2d-X3D_SOX11_nDOX)-(X3D_EV_DOX2d-X3D_EV_nDOX)
ENSG00000174080.9	1390.85	0.268014	0.186107	1.4401	0.149839	0.431124	CTSF	protein_coding	0.0117347	(X3D_SOX11_DOX2d-X3D_SOX11_nDOX)-(X3D_EV_DOX2d-X3D_EV_nDOX)
ENSG00000150938.8	2414.6	-0.358083	0.15865	-2.25706	0.0240045	0.155303	CRIM1	protein_coding	0.00866102	(X3D_SOX11_DOX2d-X3D_SOX11_nDOX)-(X3D_EV_DOX2d-X3D_EV_nDOX)
ENSG00000250722.4	53.7293	0.504652	0.392785	1.2848	0.198861	0.496842	SEPP1	protein_coding	0.0342783	(X3D_SOX11_DOX2d-X3D_SOX11_nDOX)-(X3D_EV_DOX2d-X3D_EV_nDOX)
ENSG00000204681.9	1110.37	0.527571	0.191437	2.75585	0.005854	0.0669709	GABBR1	protein_coding	0.0122008	(X3D_SOX11_DOX2d-X3D_SOX11_nDOX)-(X3D_EV_DOX2d-X3D_EV_nDOX)
ENSG00000106070.16	558.377	1.11453	0.195117	5.7121	1.11593e-08	4.32679e-06	GRB10	protein_coding	0.0115013	(X3D_SOX11_DOX2d-X3D_SOX11_nDOX)-(X3D_EV_DOX2d-X3D_EV_nDOX)
ENSG00000125124.10	874.746	0.128059	0.134012	0.955577	0.339286	0.645886	BBS2	protein_coding	0.00532223	(X3D_SOX11_DOX2d-X3D_SOX11_nDOX)-(X3D_EV_DOX2d-X3D_EV_nDOX)
ENSG00000164587.10	27056.9	-0.0895184	0.129119	-0.693301	0.488121	0.760226	RPS14	protein_coding	0.00597074	(X3D_SOX11_DOX2d-X3D_SOX11_nDOX)-(X3D_EV_DOX2d-X3D_EV_nDOX)
ENSG00000197081.11	8298.56	0.0598987	0.111182	0.538745	0.590063	0.819406	IGF2R	protein_coding	0.00432915	(X3D_SOX11_DOX2d-X3D_SOX11_nDOX)-(X3D_EV_DOX2d-X3D_EV_nDOX)
ENSG00000143416.19	2291.62	0.0400481	0.449032	0.0891877	0.928933	0.97528	SELENBP1	protein_coding	0.072035	(X3D_SOX11_DOX2d-X3D_SOX11_nDOX)-(X3D_EV_DOX2d-X3D_EV_nDOX)
ENSG00000108523.14	2290.95	-0.119871	0.111083	-1.07911	0.280538	0.590309	RNF167	protein_coding	0.00400332	(X3D_SOX11_DOX2d-X3D_SOX11_nDOX)-(X3D_EV_DOX2d-X3D_EV_nDOX)
ENSG00000101460.11	2.86648	0.543624	1.96025	0.277324	0.781531	NA	MAP1LC3A	protein_coding	0.870681	(X3D_SOX11_DOX2d-X3D_SOX11_nDOX)-(X3D_EV_DOX2d-X3D_EV_nDOX)

## Sheet: Sheet3
	baseMean	log2FoldChange	lfcSE	stat	pvalue	padj	Symbol	Gene_type	disp	contrast
ENSG00000011426.9	2179.78	-0.52821	0.193374	-2.73154	0.00630383	0.0909249	ANLN	protein_coding	0.012985	(X3D_SOX11_DOX5d-X3D_SOX11_nDOX)-(X3D_EV_DOX5d-X3D_EV_nDOX)
ENSG00000089685.13	1915.29	-0.449368	0.175071	-2.56678	0.0102647	0.119627	BIRC5	protein_coding	0.0105012	(X3D_SOX11_DOX5d-X3D_SOX11_nDOX)-(X3D_EV_DOX5d-X3D_EV_nDOX)
ENSG00000145386.8	1150.08	-0.293616	0.19829	-1.48074	0.138676	0.453989	CCNA2	protein_coding	0.0132672	(X3D_SOX11_DOX5d-X3D_SOX11_nDOX)-(X3D_EV_DOX5d-X3D_EV_nDOX)
ENSG00000134057.13	2665.45	-0.317703	0.179244	-1.77246	0.0763177	0.34323	CCNB1	protein_coding	0.0111869	(X3D_SOX11_DOX5d-X3D_SOX11_nDOX)-(X3D_EV_DOX5d-X3D_EV_nDOX)
ENSG00000175305.15	372.595	-0.133697	0.222733	-0.600256	0.548335	0.814244	CCNE2	protein_coding	0.0151305	(X3D_SOX11_DOX5d-X3D_SOX11_nDOX)-(X3D_EV_DOX5d-X3D_EV_nDOX)
ENSG00000129810.13	189.192	-0.118671	0.212198	-0.559247	0.575993	0.83104	SGOL1	protein_coding	0.0106599	(X3D_SOX11_DOX5d-X3D_SOX11_nDOX)-(X3D_EV_DOX5d-X3D_EV_nDOX)
ENSG00000112576.11	939.34	-0.204377	0.150329	-1.35953	0.173979	0.504112	CCND3	protein_coding	0.00706853	(X3D_SOX11_DOX5d-X3D_SOX11_nDOX)-(X3D_EV_DOX5d-X3D_EV_nDOX)
ENSG00000152256.12	582.917	-0.453156	0.408491	-1.10934	0.267284	0.604506	PDK1	protein_coding	0.0581962	(X3D_SOX11_DOX5d-X3D_SOX11_nDOX)-(X3D_EV_DOX5d-X3D_EV_nDOX)
ENSG00000104738.15	3640.46	-0.188386	0.166669	-1.1303	0.258348	0.596175	MCM4	protein_coding	0.00972749	(X3D_SOX11_DOX5d-X3D_SOX11_nDOX)-(X3D_EV_DOX5d-X3D_EV_nDOX)
ENSG00000132646.9	2937.11	-0.12404	0.143972	-0.861556	0.388932	0.709438	PCNA	protein_coding	0.00712192	(X3D_SOX11_DOX5d-X3D_SOX11_nDOX)-(X3D_EV_DOX5d-X3D_EV_nDOX)
ENSG00000171848.12	4981.73	-0.277359	0.177908	-1.559	0.118997	0.424361	RRM2	protein_coding	0.0111954	(X3D_SOX11_DOX5d-X3D_SOX11_nDOX)-(X3D_EV_DOX5d-X3D_EV_nDOX)
ENSG00000131747.13	4792.57	-0.278612	0.149681	-1.86138	0.0626908	0.311005	TOP2A	protein_coding	0.00784961	(X3D_SOX11_DOX5d-X3D_SOX11_nDOX)-(X3D_EV_DOX5d-X3D_EV_nDOX)
ENSG00000172115.7	3000.81	0.0789155	0.128712	0.613117	0.539799	0.808666	CYCS	protein_coding	0.00562488	(X3D_SOX11_DOX5d-X3D_SOX11_nDOX)-(X3D_EV_DOX5d-X3D_EV_nDOX)
ENSG00000109919.8	2440.71	-0.0209145	0.10171	-0.20563	0.83708	0.946694	MTCH2	protein_coding	0.00331619	(X3D_SOX11_DOX5d-X3D_SOX11_nDOX)-(X3D_EV_DOX5d-X3D_EV_nDOX)
ENSG00000005022.5	9222.32	-0.236043	0.13382	-1.76388	0.0777519	0.346182	SLC25A5	protein_coding	0.00634324	(X3D_SOX11_DOX5d-X3D_SOX11_nDOX)-(X3D_EV_DOX5d-X3D_EV_nDOX)
ENSG00000164032.10	5310.74	-0.138502	0.157086	-0.881692	0.377944	0.702569	H2AFZ	protein_coding	0.00870035	(X3D_SOX11_DOX5d-X3D_SOX11_nDOX)-(X3D_EV_DOX5d-X3D_EV_nDOX)
ENSG00000128708.11	1583.44	-0.266606	0.146534	-1.81941	0.0688489	0.326384	HAT1	protein_coding	0.00709637	(X3D_SOX11_DOX5d-X3D_SOX11_nDOX)-(X3D_EV_DOX5d-X3D_EV_nDOX)
ENSG00000080503.18	2977.52	-0.0635467	0.0924831	-0.687117	0.492009	0.782557	SMARCA2	protein_coding	0.00274368	(X3D_SOX11_DOX5d-X3D_SOX11_nDOX)-(X3D_EV_DOX5d-X3D_EV_nDOX)
ENSG00000118689.13	1977.26	-0.00269924	0.130033	-0.0207581	0.983439	0.996515	FOXO3	protein_coding	0.00557324	(X3D_SOX11_DOX5d-X3D_SOX11_nDOX)-(X3D_EV_DOX5d-X3D_EV_nDOX)
ENSG00000108799.11	775.381	0.00411634	0.141463	0.0290984	0.976786	0.993862	EZH1	protein_coding	0.00589361	(X3D_SOX11_DOX5d-X3D_SOX11_nDOX)-(X3D_EV_DOX5d-X3D_EV_nDOX)
ENSG00000138738.9	52.5549	-0.398945	0.378156	-1.05498	0.291437	0.628578	PRDM5	protein_coding	0.0324074	(X3D_SOX11_DOX5d-X3D_SOX11_nDOX)-(X3D_EV_DOX5d-X3D_EV_nDOX)
ENSG00000104960.14	4257.27	0.150573	0.124417	1.21023	0.226192	0.561111	PTOV1	protein_coding	0.00533272	(X3D_SOX11_DOX5d-X3D_SOX11_nDOX)-(X3D_EV_DOX5d-X3D_EV_nDOX)
ENSG00000120784.14	348.231	0.368237	0.213944	1.72118	0.0852181	0.363939	ZFP30	protein_coding	0.0134977	(X3D_SOX11_DOX5d-X3D_SOX11_nDOX)-(X3D_EV_DOX5d-X3D_EV_nDOX)
ENSG00000181722.14	38.0118	-0.360659	0.486937	-0.740669	0.458894	0.761051	ZBTB20	protein_coding	0.0565135	(X3D_SOX11_DOX5d-X3D_SOX11_nDOX)-(X3D_EV_DOX5d-X3D_EV_nDOX)
ENSG00000112511.16	895.409	-0.299766	0.13976	-2.14487	0.0319633	0.218902	PHF1	protein_coding	0.00592267	(X3D_SOX11_DOX5d-X3D_SOX11_nDOX)-(X3D_EV_DOX5d-X3D_EV_nDOX)
ENSG00000144579.6	1749.01	-0.185777	0.104301	-1.78116	0.0748861	0.34137	CTDSP1	protein_coding	0.00334971	(X3D_SOX11_DOX5d-X3D_SOX11_nDOX)-(X3D_EV_DOX5d-X3D_EV_nDOX)
ENSG00000126351.11	347.533	0.0610029	0.217985	0.27985	0.779593	0.927224	THRA	protein_coding	0.0141469	(X3D_SOX11_DOX5d-X3D_SOX11_nDOX)-(X3D_EV_DOX5d-X3D_EV_nDOX)
ENSG00000167074.13	637.206	-0.32645	0.160334	-2.03607	0.0417438	0.255126	TEF	protein_coding	0.00765984	(X3D_SOX11_DOX5d-X3D_SOX11_nDOX)-(X3D_EV_DOX5d-X3D_EV_nDOX)
ENSG00000123136.13	1625.3	-0.148372	0.20635	-0.71903	0.472123	0.769042	DDX39A	protein_coding	0.0146987	(X3D_SOX11_DOX5d-X3D_SOX11_nDOX)-(X3D_EV_DOX5d-X3D_EV_nDOX)
ENSG00000100697.13	1787.93	-0.016748	0.170079	-0.0984722	0.921557	0.975988	DICER1	protein_coding	0.00983955	(X3D_SOX11_DOX5d-X3D_SOX11_nDOX)-(X3D_EV_DOX5d-X3D_EV_nDOX)
ENSG00000116489.11	4135.67	-0.0471505	0.108933	-0.432839	0.665132	0.877355	CAPZA1	protein_coding	0.00403239	(X3D_SOX11_DOX5d-X3D_SOX11_nDOX)-(X3D_EV_DOX5d-X3D_EV_nDOX)
ENSG00000138029.12	4567.57	-0.135308	0.0964196	-1.40333	0.160519	0.486165	HADHB	protein_coding	0.00312852	(X3D_SOX11_DOX5d-X3D_SOX11_nDOX)-(X3D_EV_DOX5d-X3D_EV_nDOX)
ENSG00000166411.12	1609.09	-0.262344	0.149171	-1.75868	0.0786316	0.347708	IDH3A	protein_coding	0.00739736	(X3D_SOX11_DOX5d-X3D_SOX11_nDOX)-(X3D_EV_DOX5d-X3D_EV_nDOX)
ENSG00000182481.7	7813.99	-0.179421	0.125846	-1.42572	0.153949	0.476339	KPNA2	protein_coding	0.00557421	(X3D_SOX11_DOX5d-X3D_SOX11_nDOX)-(X3D_EV_DOX5d-X3D_EV_nDOX)
ENSG00000102144.12	10090.6	-0.200249	0.305475	-0.655533	0.512124	0.794392	PGK1	protein_coding	0.0335226	(X3D_SOX11_DOX5d-X3D_SOX11_nDOX)-(X3D_EV_DOX5d-X3D_EV_nDOX)
ENSG00000141376.19	669.25	0.0631163	0.146424	0.431052	0.66643	0.877717	BCAS3	protein_coding	0.00619287	(X3D_SOX11_DOX5d-X3D_SOX11_nDOX)-(X3D_EV_DOX5d-X3D_EV_nDOX)
ENSG00000067048.15	0.0539202	0.998067	7.44927	0.133982	0.893417	NA	DDX3Y	protein_coding	18	(X3D_SOX11_DOX5d-X3D_SOX11_nDOX)-(X3D_EV_DOX5d-X3D_EV_nDOX)
ENSG00000139112.9	899.593	0.0426271	0.139999	0.304481	0.760762	0.919983	GABARAPL1	protein_coding	0.00589962	(X3D_SOX11_DOX5d-X3D_SOX11_nDOX)-(X3D_EV_DOX5d-X3D_EV_nDOX)
ENSG00000105373.17	6811.46	0.0705732	0.135839	0.519536	0.603387	0.846804	GLTSCR2	protein_coding	0.00649557	(X3D_SOX11_DOX5d-X3D_SOX11_nDOX)-(X3D_EV_DOX5d-X3D_EV_nDOX)
ENSG00000078596.9	0.482942	1.19322	4.7008	0.253833	0.799625	NA	ITM2A	protein_coding	6.29203	(X3D_SOX11_DOX5d-X3D_SOX11_nDOX)-(X3D_EV_DOX5d-X3D_EV_nDOX)
ENSG00000150782.10	1484.88	-0.314945	0.168397	-1.87025	0.0614491	0.308867	IL18	protein_coding	0.00952656	(X3D_SOX11_DOX5d-X3D_SOX11_nDOX)-(X3D_EV_DOX5d-X3D_EV_nDOX)
ENSG00000159840.14	1848.79	-0.17487	0.157776	-1.10835	0.267711	0.605075	ZYX	protein_coding	0.00841932	(X3D_SOX11_DOX5d-X3D_SOX11_nDOX)-(X3D_EV_DOX5d-X3D_EV_nDOX)
ENSG00000143819.11	1529.87	-0.531352	0.368515	-1.44187	0.149338	0.469827	EPHX1	protein_coding	0.0482356	(X3D_SOX11_DOX5d-X3D_SOX11_nDOX)-(X3D_EV_DOX5d-X3D_EV_nDOX)
ENSG00000171603.15	16229.3	-0.213711	0.105834	-2.0193	0.0434566	0.26053	CLSTN1	protein_coding	0.00397283	(X3D_SOX11_DOX5d-X3D_SOX11_nDOX)-(X3D_EV_DOX5d-X3D_EV_nDOX)
ENSG00000197448.12	2649.19	-0.0631494	0.0990732	-0.637402	0.523863	0.800758	GSTK1	protein_coding	0.00315311	(X3D_SOX11_DOX5d-X3D_SOX11_nDOX)-(X3D_EV_DOX5d-X3D_EV_nDOX)
ENSG00000099977.12	585.765	-0.336454	0.201296	-1.67144	0.0946348	0.38181	DDT	protein_coding	0.0128402	(X3D_SOX11_DOX5d-X3D_SOX11_nDOX)-(X3D_EV_DOX5d-X3D_EV_nDOX)
ENSG00000128928.7	4157.56	-0.147203	0.0916937	-1.60538	0.108411	0.404757	IVD	protein_coding	0.00278974	(X3D_SOX11_DOX5d-X3D_SOX11_nDOX)-(X3D_EV_DOX5d-X3D_EV_nDOX)
ENSG00000022267.15	42.8742	0.331158	0.421955	0.784819	0.43256	0.74175	FHL1	protein_coding	0.0382968	(X3D_SOX11_DOX5d-X3D_SOX11_nDOX)-(X3D_EV_DOX5d-X3D_EV_nDOX)
ENSG00000165795.19	2728.07	0.258701	0.146668	1.76385	0.0777566	0.346182	NDRG2	protein_coding	0.00736253	(X3D_SOX11_DOX5d-X3D_SOX11_nDOX)-(X3D_EV_DOX5d-X3D_EV_nDOX)
ENSG00000178719.15	2828.38	-0.137518	0.120446	-1.14173	0.253565	0.591744	GRINA	protein_coding	0.00486431	(X3D_SOX11_DOX5d-X3D_SOX11_nDOX)-(X3D_EV_DOX5d-X3D_EV_nDOX)
ENSG00000145675.13	4397.72	-0.128573	0.1784	-0.720702	0.471093	0.768419	PIK3R1	protein_coding	0.0112416	(X3D_SOX11_DOX5d-X3D_SOX11_nDOX)-(X3D_EV_DOX5d-X3D_EV_nDOX)
ENSG00000010810.16	91.5173	2.04408	0.409147	4.99597	5.85412e-07	0.000170853	FYN	protein_coding	0.0422137	(X3D_SOX11_DOX5d-X3D_SOX11_nDOX)-(X3D_EV_DOX5d-X3D_EV_nDOX)
ENSG00000100288.18	39.2561	0.291734	0.531472	0.548916	0.583063	0.836248	CHKB	protein_coding	0.0729671	(X3D_SOX11_DOX5d-X3D_SOX11_nDOX)-(X3D_EV_DOX5d-X3D_EV_nDOX)
ENSG00000158828.5	1104.82	-0.366672	0.114165	-3.21178	0.00131917	0.0342062	PINK1	protein_coding	0.00375103	(X3D_SOX11_DOX5d-X3D_SOX11_nDOX)-(X3D_EV_DOX5d-X3D_EV_nDOX)
ENSG00000083290.18	706.51	0.0798462	0.132117	0.604361	0.545604	0.8126	ULK2	protein_coding	0.00484817	(X3D_SOX11_DOX5d-X3D_SOX11_nDOX)-(X3D_EV_DOX5d-X3D_EV_nDOX)
ENSG00000128590.4	654.914	-0.076738	0.264556	-0.290063	0.771768	0.924062	DNAJB9	protein_coding	0.0235548	(X3D_SOX11_DOX5d-X3D_SOX11_nDOX)-(X3D_EV_DOX5d-X3D_EV_nDOX)
ENSG00000123349.12	3816.64	-0.0175104	0.107778	-0.162466	0.870939	0.958132	PFDN5	protein_coding	0.00391968	(X3D_SOX11_DOX5d-X3D_SOX11_nDOX)-(X3D_EV_DOX5d-X3D_EV_nDOX)
ENSG00000174080.9	1390.85	0.0496106	0.186059	0.266638	0.789748	0.931658	CTSF	protein_coding	0.0117347	(X3D_SOX11_DOX5d-X3D_SOX11_nDOX)-(X3D_EV_DOX5d-X3D_EV_nDOX)
ENSG00000150938.8	2414.6	-0.499792	0.158772	-3.14786	0.00164472	0.0394138	CRIM1	protein_coding	0.00866102	(X3D_SOX11_DOX5d-X3D_SOX11_nDOX)-(X3D_EV_DOX5d-X3D_EV_nDOX)
ENSG00000250722.4	53.7293	0.717514	0.382621	1.87526	0.0607569	0.306962	SEPP1	protein_coding	0.0342783	(X3D_SOX11_DOX5d-X3D_SOX11_nDOX)-(X3D_EV_DOX5d-X3D_EV_nDOX)
ENSG00000204681.9	1110.37	0.501329	0.191218	2.62176	0.00874767	0.110732	GABBR1	protein_coding	0.0122008	(X3D_SOX11_DOX5d-X3D_SOX11_nDOX)-(X3D_EV_DOX5d-X3D_EV_nDOX)
ENSG00000106070.16	558.377	1.10944	0.195318	5.68019	1.34547e-08	7.80859e-06	GRB10	protein_coding	0.0115013	(X3D_SOX11_DOX5d-X3D_SOX11_nDOX)-(X3D_EV_DOX5d-X3D_EV_nDOX)
ENSG00000125124.10	874.746	-0.0691742	0.134089	-0.515884	0.605936	0.848228	BBS2	protein_coding	0.00532223	(X3D_SOX11_DOX5d-X3D_SOX11_nDOX)-(X3D_EV_DOX5d-X3D_EV_nDOX)
ENSG00000164587.10	27056.9	-0.0512914	0.129128	-0.397215	0.691209	0.887764	RPS14	protein_coding	0.00597074	(X3D_SOX11_DOX5d-X3D_SOX11_nDOX)-(X3D_EV_DOX5d-X3D_EV_nDOX)
ENSG00000197081.11	8298.56	-0.0592823	0.111199	-0.533121	0.59395	0.841333	IGF2R	protein_coding	0.00432915	(X3D_SOX11_DOX5d-X3D_SOX11_nDOX)-(X3D_EV_DOX5d-X3D_EV_nDOX)
ENSG00000143416.19	2291.62	0.204095	0.448793	0.454764	0.649279	0.872115	SELENBP1	protein_coding	0.072035	(X3D_SOX11_DOX5d-X3D_SOX11_nDOX)-(X3D_EV_DOX5d-X3D_EV_nDOX)
ENSG00000108523.14	2290.95	-0.09916	0.111031	-0.893088	0.37181	0.697676	RNF167	protein_coding	0.00400332	(X3D_SOX11_DOX5d-X3D_SOX11_nDOX)-(X3D_EV_DOX5d-X3D_EV_nDOX)
ENSG00000101460.11	2.86648	2.03261	1.9156	1.06109	0.288651	NA	MAP1LC3A	protein_coding	0.870681	(X3D_SOX11_DOX5d-X3D_SOX11_nDOX)-(X3D_EV_DOX5d-X3D_EV_nDOX)
