# Supplementary material for: SOX11 promotes epithelial/mesenchymal hybrid state and alters tropism of invasive breast cancer cells
Source: eLife. 2020 Sep 10;9:e58374. doi: 10.7554/eLife.58374 (PMC7518891; doi:10.7554/eLife.58374)
Supplement: Supplementary file 6. [file elife-58374-supp6.xlsx]

## Sheet: Sheet1
Table S6. Cell lines.
Cell line	Origin	Media
MCF10A	ATCC; LGC Standards (Middlesex, UK)	DMEM/F12 (GIBCO/ThermoFisher Scientific)
		5% Horse serum(ThermoFisher Scientific)
		20 ng/ml epidermal growth factor (EGF) (Peprotech, London, UK)
		500 ng/ml hydrocortisone (Sigma, Poole, UK)
		100 ng/ml cholera toxin (Sigma)
		10 mg/ml insulin (Sigma)
MCF10DCIS.com	Dr. Gillian Farnie	Advanced DMEM/F12 GIBCO/ThermoFisher Scientific
		5% Horse serum
BT474	CLS Cell lines service (Eppelheim, Germany)	DMEM:F12 (GIBCO/ThermoFisher Scientific)
		2 mM L-glutamine (Sigma)
		5μg/ml Insulin
		5% FBS (ThermoFisher Scientific)
BT549	ATCC	RPMI-1640 (GIBCO/ThermoFisher Scientific)
		10% FBS
		0.023 IU/ml insulin
CAL-148	CLS	DMEM (GIBCO/ThermoFisher Scientific)
		20% FBS
		10ng/ml EGF
HCC202	Dr. Paul Huang, ICR, London	RPMI-1640 (GIBCO/ThermoFisher Scientific)
		10% FBS
MX-1	DSMZ (Braunschweig, Germany)	DMEM:F12 (GIBCO/ThermoFisher Scientific)
		5% FBS
UACC893	ATCC	Leibovitz's L-15 Medium (GIBCO/ThermoFisher Scientific)
		10% FBS
BT-20	ATCC	DMEM (GIBCO/ThermoFisher Scientific)
		10% FBS
HCC1187	ATCC	RPMI-1640 (GIBCO/ThermoFisher Scientific)
		10% FBS
