# Supplementary material for: SOX11 promotes epithelial/mesenchymal hybrid state and alters tropism of invasive breast cancer cells
Source: eLife. 2020 Sep 10;9:e58374. doi: 10.7554/eLife.58374 (PMC7518891; doi:10.7554/eLife.58374)
Supplement: Supplementary file 8. [file elife-58374-supp8.xlsx]

## Sheet: Sheet1
Table S8. Antibodies used in Western blots
Protein	Antibody	Concentration
SOX11	Rabbit monocolonal	1:1000
	Clone EPR8191(2)
	ab170916 (Abcam)
TUBB3	Mouse monoclonal	1:1000
	Clone 2G10
	ab78078 (Abcam)
MEX3A	Rabbit polyclonal	1:1000
	ab79046 (Abcam)
CD24	Mouse monoclonal	1:1000
	SWA11 (Creative Biolabs)
VIMENTIN	Rabbit monoclonal	1:1000
	EPR3776 (Ab92547)
RCOR2 (CoREST2)	Rabbit polyclonal	1:1000
	ab37113 (Abcam)
N-CADHERIN	Rabbit monoclonal	1:1000
	Clone D4R1H
	13116 (Cell Signaling)
E-CADHERIN	Mouse monoclonal	1:1000
	Clone 36
	610182 (BD bioscience)
EPCAM	Rabbit monoclonal	1:1000
	Clone D1B3
	2626 (Cell Signaling)
RRM2 (R2)	Mouse monoclonal	1:1000
	R2 antibody (A-5)
	sc-398294 (Santa Cruz)
SURVIVIN	Rabbit Monoclonal	1:1000
	Clone 71G4B7
	2808 (Cell Signaling)
GAPDH	Rabbit monoclonal	1:5000
	Clone D16H11
	5174 (Cell Signaling)
LAMIN B1	Rabbit polyclonal	1:1000
	ab16048 (Abcam)
Β-TUBULIN	Mouse monoclonal	1:1000
	T4026 (Sigma)
Β-ACTIN	Mouse monoclonal	1:1000
	Clone 8H10D10
	3700 (Cell Signaling)
