# Supplementary material for: SOX11 promotes epithelial/mesenchymal hybrid state and alters tropism of invasive breast cancer cells
Source: eLife. 2020 Sep 10;9:e58374. doi: 10.7554/eLife.58374 (PMC7518891; doi:10.7554/eLife.58374)
Supplement: Supplementary file 9. [file elife-58374-supp9.xlsx]

## Sheet: Sheet1
Table S9. Antibodies and protocol used in for immunofluorescence staining
Protein	Antibody	Concentration Primary antibody	Fixation
SOX11	Mouse monoclonal clone SOX11-C1 50-9773-82 (EBioscience)	1:200	1
K8	Mouse monoclonal TROMA-I deposited by Brulet, P. / Kemler, R. (DSHB)	1:10	1
K5	Rabbit polyclonal PRB-160P (Biolegend (formerly Covance)	1:200	1
K14	Rabbit polyclonal PRB-155P Biolegend (formerly Covance)	1:200	1
CD24	Mouse monoclonal (SN3) (Invitrogen/ThermoFisher)	1:50	2
⍺-SMA	⍺-SMA Alexa Fluor555 clone EPR5368 AB202509	1:200	1
VIMENTIN	Rabbit monoclonal EPR3776 (Ab92547)	1:400	1
E-CADHERIN	Mouse monovclonal clone 36 610182 (BD bioscience)	1:200	2
N-CADHERIN	Rabbit monoclonal Clone D4R1H 13116 (Cell Signaling)	1:50	2
TUBB3	Mouse monoclonal Clone 2G10 ab78078 (Abcam)	1:100	1
MEX3A	Rabbit polyclonal ab79046 (Abcam)	1:100	1
Cells were fixed with 4% paraformaldehyde and permeabilised in 0.25% (1) or 0.05% (2) Triton X-100. Primary antibody was diluted in PBS plus 1% BSA and 1% Horse serum. After washing, cells were incubated with secondary antibody (dilution 1:200) and DAPI (1:5000).
